# Supplementary material for: Integrated Transcriptome and Proteome Analysis Provides Insight into the Ribosome Inactivating Proteins in Plukenetia volubilis Seeds
Source: MDPI journal article supplement (doi:10.3390/ijms23179562), 2022-08-24
Supplement: s1 [file s1]

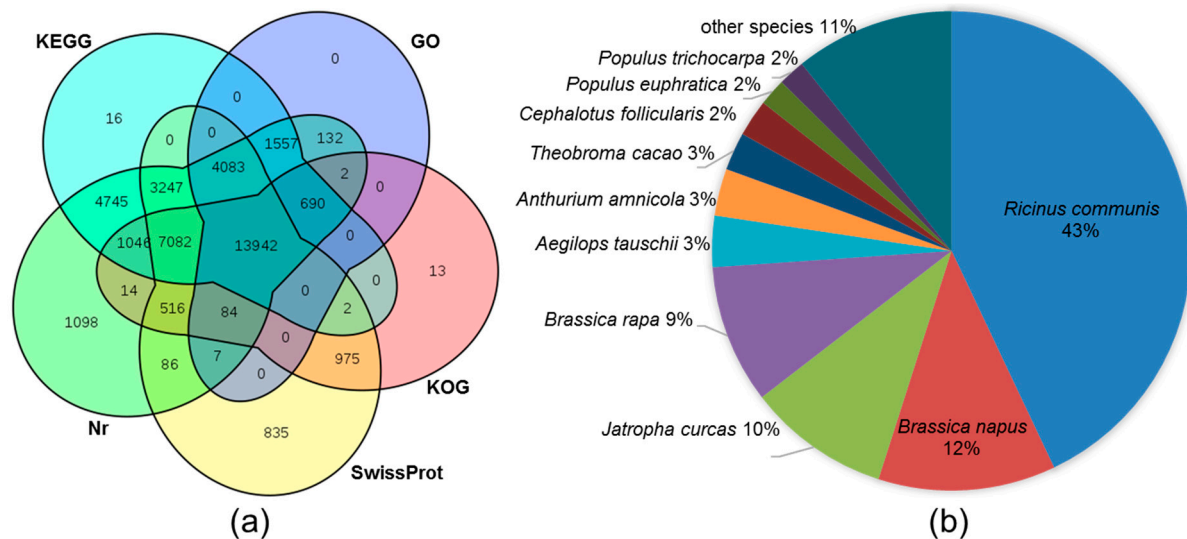

**Figure S1. (a)** Venn diagram of number of transcripts annotated by BLASTx against GO, KEGG, Nr, SwissProt, and KOG databases. **(b)** The numbers of transcripts matching the 10 top species using BLASTx in the Nr database.

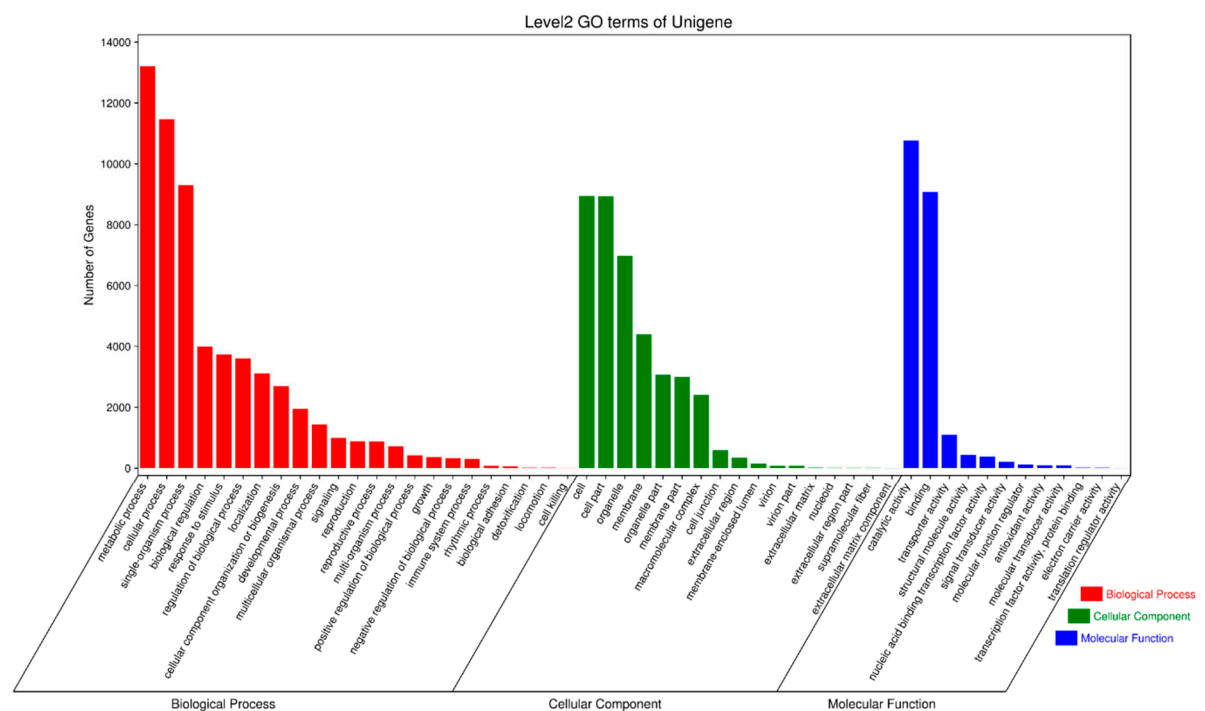

**Figure S2.** GO categories for transcripts in the transcriptome. The y-axis represents the number of transcripts in a category.

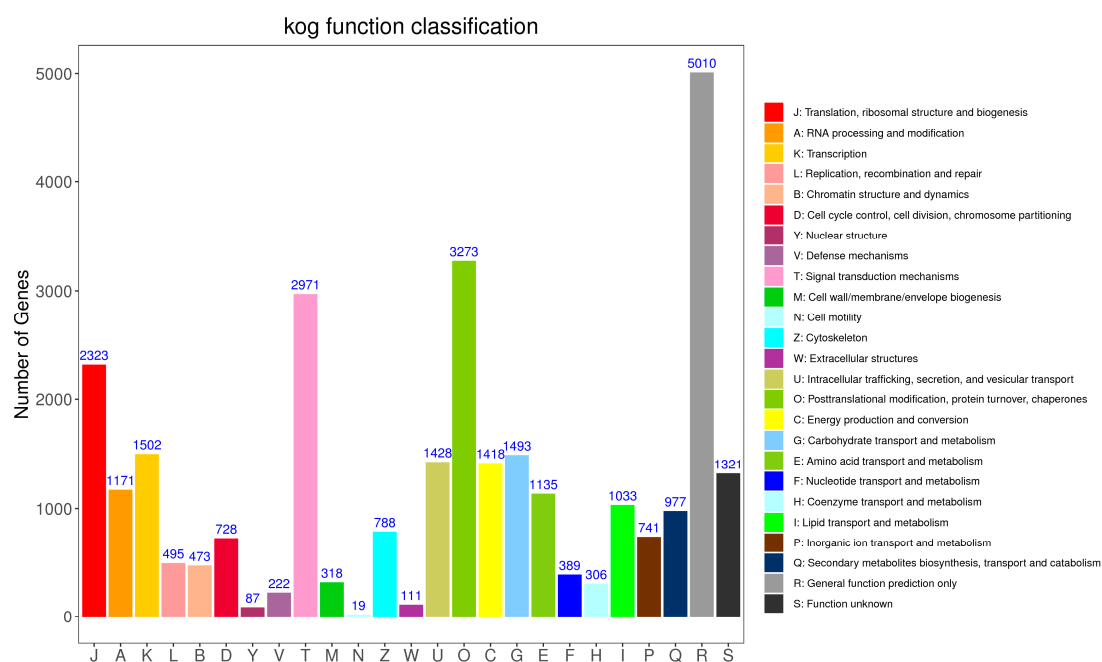

**Figure S3.** KOG functional classification for the transcriptome sequences.

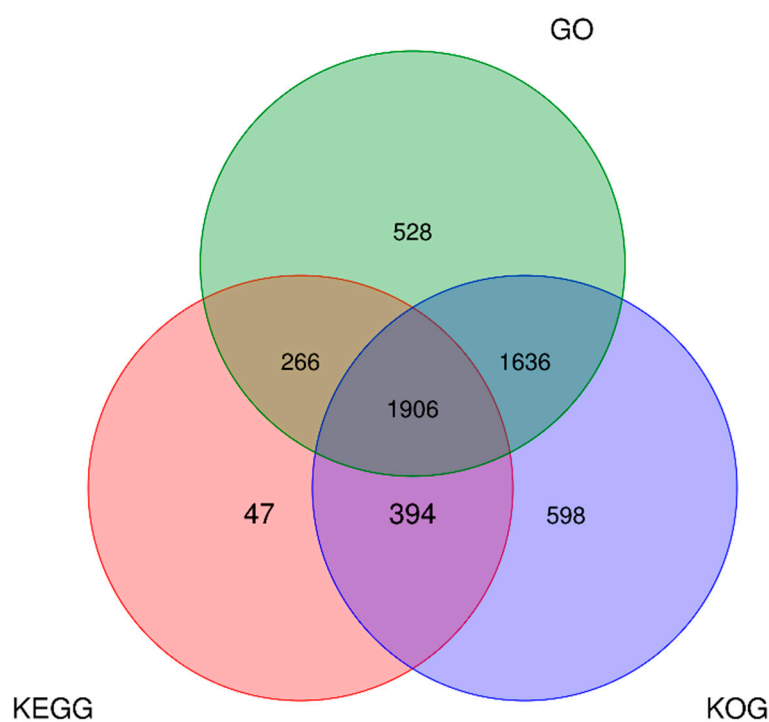

**Figure S4.** Venn diagram of identified proteins numbers annotated by BLASTx against GO, KEGG and KOG databases.

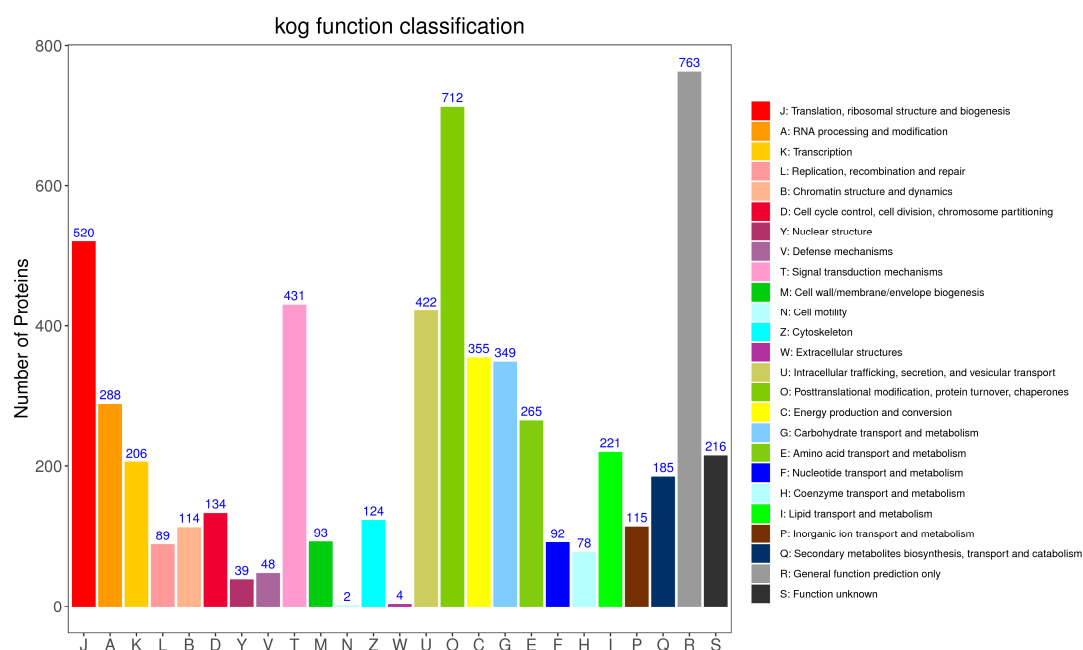

**Figure S5.** KOG functional classification of all identified proteins.

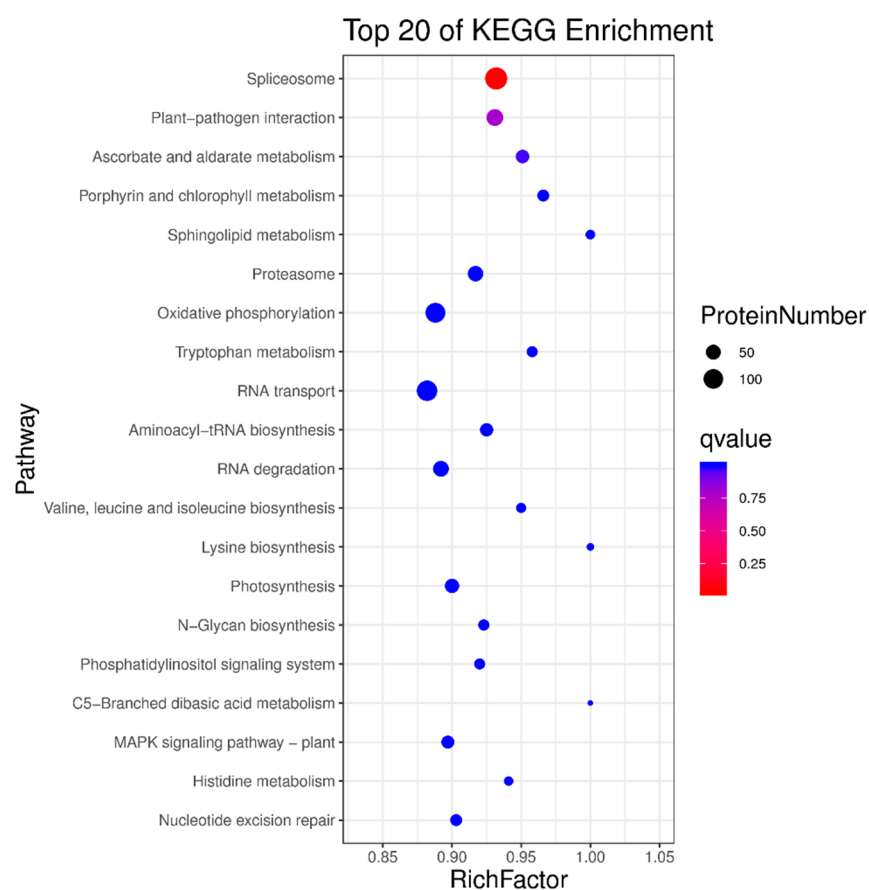

**Figure S6.** Top 20 KEGG pathways enriched by unique differentially abundant proteins between the Pv-1 and Pv-2.

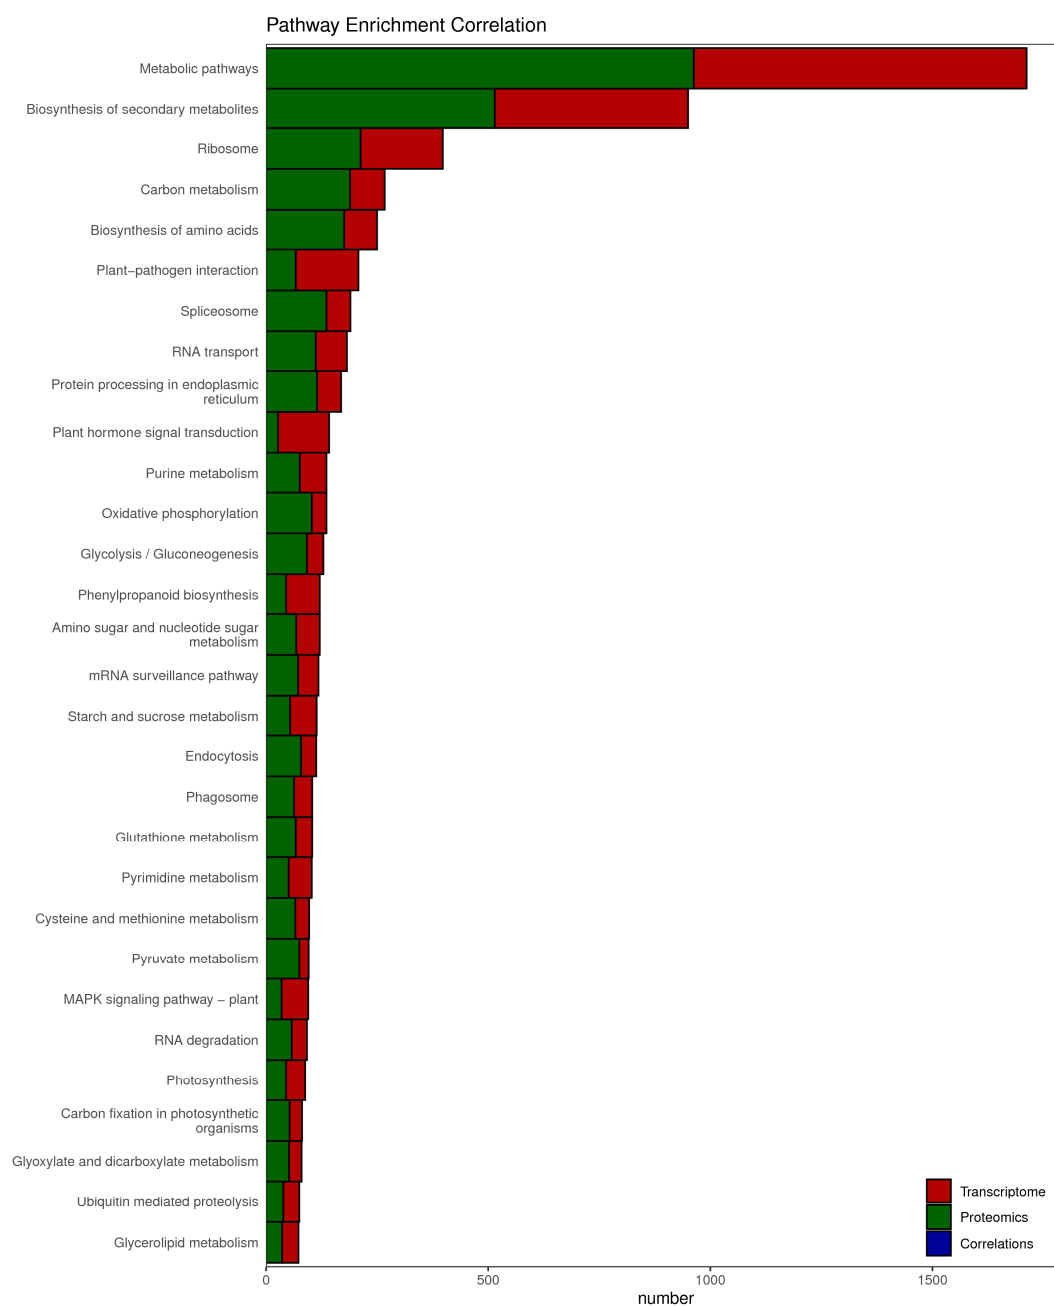

**Figure S7.** KEGG pathway enrichment of DEGs/DAPs. Red bars represent DEGs in the transcriptome; green bars represent DAPs in the proteome; blue bars represent the number of both DEGs and DAPs.

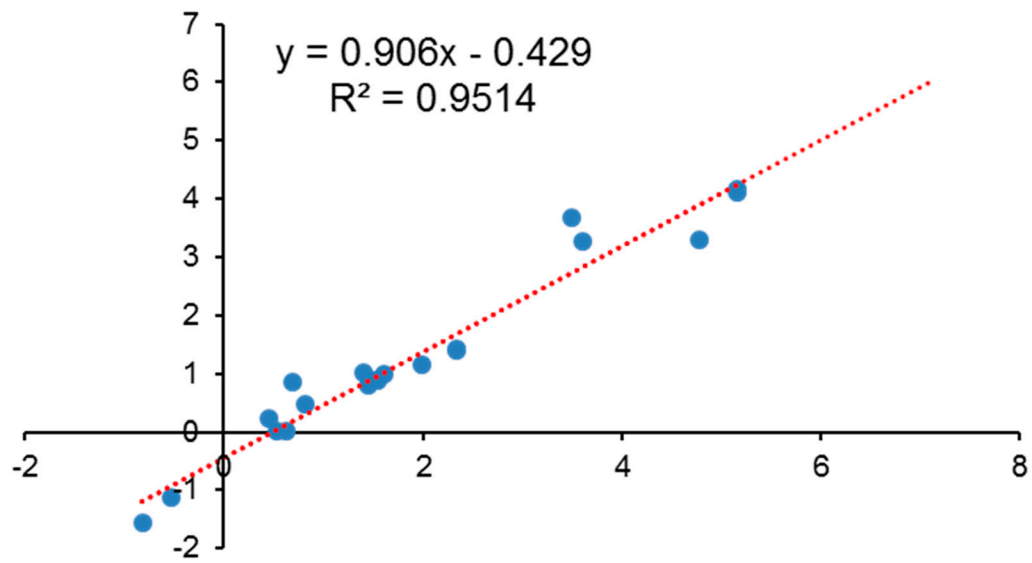

**Figure S8.** The correlation between qRT-PCR and the transcriptome data, as shown by values of log2(RPKM ratios) obtained by RNA-seq (x-axis), plotted against the values of log2(relative expression ratios) obtained by qRT-PCR (y-axis) for the ten RIP genes. Each sample was analyzed in three biological replicates.
